# Supplementary material for: Interactions between Vitamin D Genetic Risk and Dietary Factors on Metabolic Disease-Related Outcomes in Ghanaian Adults
Source: MDPI journal article supplement (doi:10.3390/nu14132763), 2022-07-04
Supplement: s1 [file s1]

**Supplementary Table S1. Genotypic and allelic frequencies of the single nucleotide polymorphisms that were used to create the genetic risk score**

|                | Single Nucleotide Polymorphisms | Nucleotide Change | Total | Common Homozygous | Heterozygote | Rare Homozygous | Hardy Weinberg Equilibrium <i>p</i> Value | Minor Allele Frequency | dbSNP* Frequency in Africans AFR |
|----------------|---------------------------------|-------------------|-------|-------------------|--------------|-----------------|-------------------------------------------|------------------------|----------------------------------|
| <i>VDR</i>     | rs2228570                       | T/C               | 279   | TT: 4             | TC: 87       | CC: 188         | 0.08                                      | T= 0.17                | T=0.31250000                     |
|                | rs7975232                       | C/A               | 279   | CC: 29            | CA: 123      | AA: 127         | 0.92                                      | C= 0.32                | C=0. 35929999                    |
| <i>DHCR7</i>   | rs12785878                      | T/G               | 279   | GG: 221           | TG: 55       | TT: 3           | 0.84                                      | T= 0.11                | T= 0.17019999                    |
| <i>CYP2R1</i>  | rs12794714                      | A/G               | 279   | GG: 230           | GA: 46       | AA: 3           | 0.68                                      | A= 0.09                | A= 0.10290000                    |
|                | rs10741657                      | A/G               | 270   | AA: 21            | AG: 100      | GG: 158         | 0.35                                      | A= 0.25                | A=0.21860000                     |
| <i>CYP24A1</i> | rs6013897                       | A/T               | 279   | TT: 157           | TA: 100      | AA: 22          | 0.28                                      | A= 0.26                | A= 0.26019999                    |
| <i>GC</i>      | rs2282679                       | C/A               | 279   | AA: 263           | CA: 16       | CC: 0           | 0.62                                      | C= 0.03                | C= 0.04990000                    |
| <i>CASR</i>    | rs1801725                       | T/G               | 279   | GG: 27474         | TG: 5        | TT: 0           | 0.88                                      | T= 0.01                | T= 0.00980000                    |

\*dbSNP database: <https://www.ncbi.nlm.nih.gov/snp/> [1]

#### References

1. National Centre for Biotechnology Information. <https://www.ncbi.nlm.nih.gov/snp/>.

**Supplementary Table S2. Genetic associations of vitamin D-GRS with clinical and biochemical measurements**

| Clinical and Biochemical Parameters | GRS < 2  |              | GRS ≥ 2  |              | <i>p</i> Value |
|-------------------------------------|----------|--------------|----------|--------------|----------------|
|                                     | <i>n</i> | Mean±SE      | <i>n</i> | Mean±SE      |                |
| BMI (kg/m <sup>2</sup> )            | 68       | 1.41± 0.008  | 211      | 1.42± 0.005  | 0.12           |
| WC (cm)                             | 68       | 1.94± 0.003  | 211      | 1.94± 0.002  | 0.88           |
| WHR                                 | 68       | -0.04± 0.021 | 211      | -0.05± 0.012 | 0.66           |
| BFP (%)                             | 68       | 1.48± 0.014  | 211      | 1.47± 0.008  | 0.43           |
| Glucose (mg/dl)                     | 68       | 0.64± 0.008  | 210      | 0.63± 0.004  | 0.24           |
| HbA1c (ng/ml)                       | 68       | 0.73± 0.006  | 207      | 0.72± 0.003  | 0.20           |
| Fasting Insulin (uIU/ml)            | 64       | 0.98± 0.034  | 206      | 0.98± 0.019  | 0.98           |

All variables were log transformed. All associations were adjusted for age, gender, total energy intake and BMI (except BMI which was not adjusted for when the outcome was BMI). Abbreviations: GRS: genetic risk score, BMI: body mass index, WC: waist circumference, WHR: waist-hip ratio, BFP: body fat percentage, HbA1c: glycated haemoglobin.
